# Supplementary material for: A multi-omics study of magnesium sulfate to improve prognosis in sepsis-related encephalopathy: integrating clinical data-driven network pharmacology
Source: Front Cell Infect Microbiol. 2025 Jun 9;15:1607586. doi: 10.3389/fcimb.2025.1607586 (PMC12183159; doi:10.3389/fcimb.2025.1607586)
Supplement: Supplementary file 2 [file Supplementaryfile2.xlsx]

## Sheet: Sheet 1
Detailed information on drug targets and disease-associated genes
Only Liusuanmei	Only SAE	Liusuanmei AND SAE
MAGT1	DPYD	ALB
SLC26A2	EPG5	SULT1A1
IDUA	IKBKG	SULT1A3
CLDN16	SIRT1	SERPINC1
TRPM6	BCL10	ADCY10
NIPA2	STAT3	TNF
FXYD2	TIMP1	F3
SLC26A1	TRAF6	CXCL8
NAGLU	TUG1	PPM1D
HSPG2	ATG5	REN
TRPM7	ROCK2	IL6
CASR	XIAP	F5
CLDN19	TNFAIP8L2	VEGFA
ARSB	IL33	GFAP
CNNM2	CAMK2D	ICAM1
SLC12A3	CTH	AQP1
EGF	ANGPT2	IL1B
GUSB	SELE	THBD
ARSA	SERPINA6	CBS
GLB1	HAMP	SERPINE1
KCNJ10	OGT	TGFB1
CLCNKB	PICK1	NOS2
CHSY1	TRIM45	VWF
PAPSS2	PGF	APOA1
HPSE	ITGAX	SOD1
STS	TNFAIP3	ITIH4
PCBD1	IGFBP7	SLC2A1
BSND	TNFSF14	MMP2
DCN	ATF3	UMOD
SULT2A1	CNR2	CAT
PAPSS1	MAP1LC3A	NOS3
KCNA1	TNFRSF1A	ELANE
HNF1B	ELP1	CXCL12
FGF2	TREM1	BDNF
XYLT2	AGER	IL1A
ARSH	OGA	EDN1
CNNM4	PPARGC1B	AGT
MMGT1	ACOD1	ALPI
SLC26A4	TEK	ITGAM
ACAN	PDCD1	HMGB1
SLC12A1	MIF	VIM
ATP1A1	WNT5A	RHOA
KCNJ1	PTBP1	RAC1
SARS2	GSDMD	UGT1A10
SDC1	CTCF	ENO2
INS	NPAS4	EPO
SULT1E1	ANGPT1	CCKBR
SLCO2B1	TLR1	SPARC
DNAH8	PRDX2	XDH
FAM111A	JUP	TGM2
CD44	TFPI	NFKB1
SLC26A6	PTX3	TLR4
APOE	DIO2	IL1RN
EXTL3	ORAI1	ACE
SLC26A3	PLIN4	ITGA4
APP	FKBP5	SPHK1
GPC3	LY6A	CSF2
IGF1	CH25H	PPARA
SULT2B1	LRG1	SRC
ABCG2	LY6C1	MMP9
TUSC3	CIRBP	PRTN3
PTH	MKKS	NPPA
SLCO1B1	APOD	ITGB3
LPL	CORT	P2RX7
NIPAL4	PGYRP1	APC
SNCA	ARRDC2	CD14
CCK	RBM3	CTNNB1
CHPF	ITGAD	VCAM1
NEU1	ETNPP1	NPPB
SMPD1	LRRCC8A	CD40
SELP	HIST1H2BE	ANXA2
FGFR2	ROBO4	IL10
HEXB	FCGR3	CXCL1
CD36	FCGR4	MBL2
VTN	SERPINA3N	C4B
HRG	TNFRSF25	TGFBR2
ELN	COL4A1	IRAK1
AMBP	MOBP	LGALS3
CYP19A1	HMGCS2	AQP4
FGF1	IFITM2	HIF1A
F9	ITIH3	S100B
PF4	RHOJ	TNFRSF1B
BGLAP	DDIT4	CETP
SLC22A8	EGR2	MAPK13
SPP1	IFITM3	ADAMTS13
SELPLG	ALOX5AP	MYLK
MGAM	LRRCC75A	PROS1
KCNMA1	SLC47A1	SERPINF1
CHPF2	SAA3	RELA
SHBG	UGT8A	TLR9
PRL	EMP1	S100A8
LTF	S100A9	SFTPB
FGFR1	MS4A6D	ANGPTL4
ABCC2	DDC	NLRP3
CP	FAM212B	C3
SLC22A11	AGRP	NFKBIA
CD4	ARC	ADM
SLCO1A2	TUBB6	DAPK1
ALPP		CST3
COL2A1		FLT1
SELL		GPX3
SLCO1B3		IDO1
FN1		TIMP2
POMGNT2		SOCS3
SI		LTA
CYP3A4		ENG
HPRT1		CD93
F2		CRYAB
OXT		LCN2
GNA11		SGK1
CFH		TXNIP
F10		GRK5
HGF		FYN
GAL3ST1		PNPLA2
SLC22A6		PLK1
ATP1A3		CHUK
SLC26A5		RETN
SLC17A5		ACER2
CYP3A7		GRK2
ABCC1		BECN1
CFTR		CEACAM1
UGT1A1		IKBKB
PLCG1		CD274
LEP		CDH5
COMT		TFAM
HTT		S100A11
GLA		CISH
LDLR		OVGP1
CTSD
CTSA
ESR1
CLU
PLA2G6
APRT
ABCB1
MOCS1
KCNJ2
TNFRSF11B
BMP6
PTHLH
GAST
SLC6A3
ADAMTSL1
INSR
BPNT2
MPO
GCH1
MAPK1
TMEM94
MAPK3
FBN1
CYB5A
CYP1A2
PRNP
TF
GRIN2B
POMC
CREB1
UGDH
VDR
IGFBP3
MAPT
CACNA1B
ATP7B
RYR1
ATP7A
SLC10A1
MDK
ABCC3
THBS1
NR1I3
EEF1A1
TNFAIP6
TG
ABCB11
G6PD
ITGB1
ITGB2
GRIN2A
OPRM1
CTSK
IGF2
APEX1
PLAT
ATP1A2
TKT
IDH1
ATM
ABCC4
CALCA
GRIN1
ADIPOQ
ATP4A
PPBP
PPT1
CYP2C9
SLCO4A1
CYP2D6
TAT
ERCC2
AQP2
CTSG
UGT1A9
UGT1A6
TNC
APOB
BMP4
PIK3CG
SLC22A7
PPM1G
MUC1
TFRC
LRP1
KCNJ5
M6PR
IMPA1
CCL2
BMP2
IL3
ADA
PSPH
PDP1
CIB1
CRH
POR
ALAD
CSN1S1
CRP
OXA1L
SOD3
ACY1
UGT1A3
KCNH2
DNASE1
PLAU
PRPS1
GRIN3A
FGFR4
DRD1
GAL3ST3
ITGA2
MMP3
SUCLA2
CTNS
NID1
IL7
IFNG
BPNT1
LOX
GJB2
CGB5
GC
NCAM1
CYP3A5
MAG
TBP
TUBA1B
PTGS2
TUBB
ATP13A2
CYP2C19
SHH
ADCY5
COL18A1
MBP
PRKCA
ATXN3
ASPA
UGT1A4
PLA2G2A
GHRL
CYP1A1
GLUD1
GLUL
ACHE
CSF1
RNASE3
ERVK-6
TAF1
KDR
SLPI
MAPK8
GPT
NFE2L2
CACNA1S
POLB
PVALB
SERPINA7
ACE2
CERK
CYP11A1
KLK3
ADCY1
UGT2B7
BCL2
UGT2B15
GRIN2D
TTR
CCKAR
GCDH
B4GALT6
GSR
SRR
RAB7A
PLOD1
MCOLN1
DSPP
CYCS
PRKN
WNK4
ATXN2
CYP1B1
ITGAL
ALPL
TRPV5
PXYLP1
KARS1
IVL
HSD17B13
TNFSF11
EGFR
PPARG
FGFR3
CXCR3
HMGCR
FURIN
UGT2B4
KNG1
KCNJ11
RBP4
PGR
IL2
NDUFS4
GCK
PNP
WNK3
CXADR
MMP13
DUSP19
G6PC1
FEN1
PPA1
SMPD2
AMT
POLR3A
IBSP
DBH
IGFBP1
GH1
FLG
GSS
TGFB2
MMP1
ADRB2
RYR2
TP53
FOS
GRIN2C
AR
HAO1
IAPP
AIFM1
DES
ITGA1
UGT1A7
MOCS2
F8
GNRH1
CCL4
LRP2
KLRK1
PRG2
KITLG
ABCC8
PDE4A
MTHFR
ARHGAP1
FTL
UGT1A8
MET
NR1I2
CD8A
ADPRH
ADRB1
ACP1
VPS13A
P3H1
KCNJ4
H6PD
BAX
ENO3
CDKN1B
CSF1R
RNASE1
SLC4A1
HMGCL
CXCL10
RAD51
AQP3
CFP
HRAS
RS1
KRIT1
UCP2
KCNJ15
GSTP1
B2M
ADPRS
THPO
GGT1
POLG
CHGA
ADK
FHIT
GNAL
WNK1
EPHX2
SLC2A4
CASP3
PKM
CD55
ABAT
PDPR
GAA
SMPD3
CDC42BPG
PGM1
AFP
SOD2
IGF1R
CDKN1A
HLCS
LAMP1
PEX1
STT3B
ATP2A3
IL1R1
WRN
CYP2E1
CD34
ANO3
CTPS1
NTS
CDKN3
ODC1
BACE1
CDC42
LPIN1
DUT
PANK2
CAV1
GSN
BMP7
BRCA1
ALDOB
IGFBP5
SOX9
HSPA5
HP
PTK2B
COG2
MECOM
RNASEH2A
AHSG
RUNX2
C19orf12
CYP2A6
POLR3K
RPS6KA5
ACR
NGF
ATP2C1
TOP1
SST
CA2
C5AR1
PPIB
SLC9A3
LIPC
AGK
IL4
FOXG1
PLCB4
GPHN
CCN1
SLC6A4
CORO1A
CSNK2A1
IDH2
F11
HSPA4
GRIA1
IL18
CYP2B6
APOH
UGT2B17
CASK
SERPINF2
GRIN3B
SLC8A1
SERPINA1
TUFM
ST3GAL4
TGM1
F2R
AGA
PTGS1
FGA
FAM20B
ATP2B4
SLC10A2
PC
PRKAR1A
MAPK10
CD79A
IL5
CGA
BTD
SIK2
OXTR
PIK3C2A
RYR3
ASAH1
AHR
NAGS
UGT1A5
TAC1
VIP
GZMB
MB
GSTM1
HBB
NRP1
GABBR1
GAPDH
ABCB7
SERPINB2
ITK
IDH3A
CD9
PEX10
PEX26
PEX12
PKLR
BCL2L1
MAPK14
LACTB
ALOX5
NPY
CANT1
B4GALT1
AKR1C1
TGM3
SLC12A2
PTEN
AKR1C2
FAS
HELLS
FGG
CD27
NME1
IRS1
OTC
BCHE
AKT1
CLEC11A
RAN
LMNA
NOS1
HAS2
CEL
MAPK12
GNAI1
PTK2
HMOX1
ME2
SHROOM3
NOG
FGF23
CPQ
PI4KA
TGFBR1
PRPS2
POLR1C
SMAD3
PPIG
STK39
HNF1A
CSNK2A2
TOP2B
PTPA
ATP2B1
PDXP
GNE
GFM1
QDPR
ACACA
NR3C2
GP1BA
LYST
LCAT
ANXA1
TRPM3
ARF1
PON1
PDE5A
ATP12A
PTS
CHRM2
SLC22A5
CDK4
F7
PRMT7
PIK3CA
ADSL
ITGA6
FLAD1
CYP2C8
SYP
CALR
MAOB
PFKM
ATP5PO
TGFA
KCNJ12
SLC5A6
SNRPA
JUN
ADRA1A
OR4D2
FBP1
KRT18
ITIH2
PLPP3
MPG
TREX1
ALK
PAK1
TESC
IGHE
AKR1B1
TRPV1
LAP3
ITIH1
ADCY2
GHR
ALDOA
BLM
ITPA
PGS1
ACADVL
ACADM
CHRNA2
UGCG
KCNJ6
CDK2
BPI
CTSB
LAMA1
OPA1
VDAC1
DRD2
PCNA
NTF3
CLCN5
HADHA
SBDS
MC2R
IL2RA
OGG1
PTP4A1
MAP3K1
DHFR
NF1
NRG1
FMR1
NECTIN2
KCNJ3
NR1H2
FECH
CD40LG
MAOA
RAB5A
GCA
ENO1
NT5C3A
GDE1
ITGA2B
SP1
GFPT1
ADRA2A
ATP2A2
DCD
ANXA5
GABRA3
MIPEP
HOXD9
CIB2
LPO
GRM3
HDAC9
MC4R
GCLC
IL6R
COX5A
CRAT
RPS27A
SCN4A
INPP1
JAK2
SMPD4
LATS1
SLC10A7
ENTPD1
HAS3
HAS1
AGXT
PDGFA
BRAF
CSK
ABL1
RNPC3
CPS1
POMT1
GUCY2D
PYY
ABCD1
POLR2A
GSK3B
CCN2
CAMK2G
CR1
MAP2
PLD1
ATP2C2
DEFB1
RHOD
CD58
PLA2G4A
HTR3A
P4HB
FASN
ATP8A1
PROC
GEM
RPS6KA4
GRP
FBP2
RGS4
COL1A1
TTN
IDI1
IL17A
IFNA2
PDYN
POLI
PEX6
PDGFRB
EHMT2
NME2
MGMT
GPLD1
CYP3A43
LCN1
SMN1
LIF
UCK2
SCG5
OPRK1
SERPINA3
ITPR1
FSHR
DPP4
HSPD1
GPI
MYC
STATH
ERBB2
RNASEH2B
PDXK
ADRA1D
MADCAM1
GATA3
PAM
ADRA1B
PSIP1
IFNA1
SMAD1
RECK
MDH2
SDHB
MAP3K8
ME1
ATP1B1
HDAC8
ITGA3
CKB
TRPV6
NTRK2
CPOX
ALDH1A1
FUCA2
MAGED2
TIAM1
UMPS
MLN
FAH
NSF
STK11
CALCRL
GSTT1
TGIF1
FASLG
NQO1
PRKAA1
LALBA
CA1
NAGA
PRKD1
LCT
IL13
SPG7
TYR
POMT2
ALDH9A1
ARF6
MAP3K7
PGK1
ADH1A
C1QBP
ADCY9
LIG1
SRPK1
MDM2
ALDH5A1
ERBB4
NGFR
FOXP3
ADRB3
MAST4
MAPK7
TPO
VCP
DNTT
CHPT1
RPS6KB1
CCND1
CDK1
CYP2C18
ACLY
ITGAV
NT5C2
TNFSF10
CXCR2
TPI1
RAF1
HSP90AA1
MAP2K1
GALK1
DGKQ
AGTR1
FGB
CDH1
CHRM3
GSTT2
SCNN1B
FMO2
FMO3
PRKG1
PRKCQ
RNASEL
PLCB1
ACSM2A
TPMT
CYP7A1
ENTPD2
MSH2
PECAM1
KIT
HBG2
HSPB1
NME4
CEACAM5
ERN1
GAMT
FCER2
TRPM1
HSPA8
CSN2
ANTXR2
GPX1
TPH1
PIK3CB
HPX
ASS1
CDIPT
NR1H4
CHAD
DMPK
FBN2
ABCC6
FABP12
PYGM
MUC2
ITGB7
ERAS
SHC1
HSPA1A
AKR1A1
ANPEP
RAG1
GRIA3
RAMP1
CACNB1
HCRT
PTP4A2
SARM1
LIPE
GAD1
EDNRA
SLC17A1
PPP2CA
GRM1
CASP1
CNTF
HK1
MTR
DPAGT1
CACNA1C
CACNA1D
STING1
LAMC2
TARDBP
IFNB1
EGR1
CCL27
MAP3K2
FDFT1
PRKCB
ACSM5
ACSM4
HSD17B10
DMGDH
CTRL
GAL
PINK1
MARK1
STK38
SLC11A2
HTN1
BCR
MAT1A
MAT2A
CHRNA4
H4C16
SP7
SLC25A4
CD80
CS
CACNB2
CACNB4
CACNB3
ENPP3
CHRM1
CFLAR
DMP1
DEFB4A
CYP2A13
DMD
GPD1
ENTPD3
DPM3
MAPK9
LTC4S
PDE4D
GJA1
LPA
HNF4A
CPT2
CD46
CXCR1
TAOK2
PHOSPHO1
CYP2J2
MIP
NEFL
CACNA1F
DDIT3
ALPG
TXN
TUBA4A
PDE8A
ADAM12
FTH1
TOP2A
DARS2
GAD2
INPPL1
NEK3
MCM9
EYA1
POLR2L
ADCY3
ADCY7
CAMK4
PRKAA2
IL1R2
SLC1A3
PARP1
FXN
FH
CKM
CD86
SLC34A1
UBLCP1
ILK
FOLR1
HADHB
PTP4A3
TACR1
PCYT1A
SYT1
COL7A1
RHO
CACNA1A
MKI67
POLK
CDK9
RFK
MYO7A
PDE3B
CHAT
ITGA5
RET
EPHX1
GCG
CCNA2
ADH4
SCARB2
STX1A
SLC2A2
CSNK2B
ACTB
HFE
SLC16A10
PRKACA
GK
CALB1
A2M
GSTZ1
PHYH
TNK2
MT3
CASP8
CPT1A
PLEK
ITGA7
SCT
SGCB
HRH2
CDKN2A
ENSG00000273171
ABCA1
ADH1C
TSPO
PPAT
PCK1
TYMS
AHCY
SFTPD
GNAS
TRAP1
CCL8
APOC3
CASP2
SLC13A2
PFKL
RPH3A
PGK2
AMHR2
LATS2
MAP3K12
MAP3K9
DYSF
XRCC1
GNMT
NTRK3
POLR3B
SLC5A1
TCN2
ADH1B
SLC25A24
ACSL3
PSEN1
CEPT1
TNNC1
KL
EEF1A2
MFAP2
SELENOP
LTB4R
GSTA1
SLC20A1
SUCLG1
ACTA1
SLC7A9
HBG1
GSTO1
GSTO2
TAS2R7
SLC23A1
MT-CO1
DGUOK
PLA2G7
OGDH
TNFRSF11A
SMN2
CCNB1
SLC3A1
ETFDH
POLR1H
LEPR
NAT2
SLC16A1
MEPCE
DCK
INTS4
PRPSAP1
PRPSAP2
CYP4B1
BRCA2
CDK5
AURKB
NEK7
SAT1
FPR1
TRPC5
JUNB
GSTA2
NUDT15
CHKA
AMACR
PNOC
SAFB
SETD2
FABP6
ABO
SYK
LYZ
AHSP
PCK2
PIK3C2B
SUPV3L1
TRH
SSBP3
CGB3
COL1A2
CCL17
SLC25A3
SCN5A
MME
CALM1
EPX
TGFB3
PHKA2
TWNK
SLC25A13
TK2
ACP5
BMPR1A
BMPR2
ADPGK
EYA4
MAP2K2
FGF5
KAT2B
ATP6AP1
SOST
STX2
GZMA
RHD
ABT1
ANG
HSP90B1
SLC20A2
RPA1
AOC1
PXN
SNAP25
DPYS
CFI
MT-CYB
PRDX1
RIPK2
MAP3K11
MYLK3
CDK11B
STK32A
SORT1
AKT2
PRKCD
C1QA
LCK
GSTT2B
HMBS
GMPS
SCN1A
SCN2A
C1GALT1
BTK
MT2A
PRKCH
WAS
AGPS
ACOX1
CIDEB
NSUN2
D2HGDH
OSGEP
PMM2
NTF4
NUDT2
PITX2
PTGDS
DBT
ITGB5
ASAH2
XPC
RAI1
SRF
ADCYAP1
PLIN1
SLC5A7
PTK7
PTH1R
ACSL5
B3GALNT1
CYB5R3
DSP
NAT1
PREP
GMNN
NOX4
DLD
SORD
KRT8
MYO1A
PABPN1
CAMP
LPXN
CYP2S1
CYP2F1
CYP4X1
CYP4Z1
CYP2A7
SLC23A3
AQP7
CEACAM3
ARG2
PLCG2
DRD3
ADORA2A
ERBB3
WFS1
KCNN2
SAMHD1
MUSK
GYPB
PIKFYVE
GABRA1
POLR1A
NRXN1
GHRH
UCN2
H3C14
ADORA1
PDGFRA
KLK15
IL2RB
INTS3
TLR7
SCN9A
LIG3
SLC6A9
SLC18A2
GSTM3
GSTM2
GSTM5
TAF6
INTS2
LIPG
HGD
ENPP7
SLC1A2
PRKAB2
PMM1
UBB
KCNA5
MGP
HSD11B1
AMD1
IGFBP4
EPHA2
NR0B1
SCN7A
ACYP2
HSP90AB1
LRRK2
HLA-B
ATP6V1A
ATP6V1E1
CES2
DHX37
FCSK
FLVCR2
MUC16
TBXA2R
CYBRD1
MTOR
HLA-DRB1
DST
C9orf72
MYCN
P2RY1
PRDX5
CHKB
ZAP70
PLA2G3
PROCR
KDM4A
SLC22A12
POLG2
KCNQ1
DDO
PTPN1
VCL
MLH1
FABP2
PNPLA3
EDN3
FOLH1
C1QB
GUK1
TFAP2A
CD59
PTPN3
RRM2B
PHKG2
ATP6V0A2
MCCC2
SLC19A1
GMPPB
POMK
FCGR3B
DICER1
CYBA
SLC7A2
NCOA1
PLA2G1B
ACMSD
TRMT5
APOA4
GPRC6A
CYP27B1
GARS1
ITGB6
HSPE1
MTHFD1
TRIM22
MVK
DPM1
PLA2G2D
HDAC1
SERPINH1
TNFRSF10A
FABP1
CARNS1
MYOC
DNMT1
PLA2G2E
HPGD
CALB2
THRB
S100A7
E2F1
TJP1
IDE
GP6
LGALS3BP
EPHB4
BDKRB2
UCP1
EFS
RNASEH2C
MCL1
AK2
CMA1
LPIN3
SLC5A8
MCM7
FCGR2A
C1QC
PTPN6
TFF2
EGLN1
HDAC4
IFIH1
PCCA
PCCB
PDHA1
ACADSB
MCCC1
HIBCH
PHEX
PDE2A
GAP43
P2RY12
GAS1
PRKCE
KLK11
XRCC6
MAP2K4
HTN3
EIF2S1
TRAF3
PHB1
XK
PPARD
VASP
C11orf65
ALDH2
NAMPT
SLC46A1
SCN8A
SCN10A
SCN3A
SCN11A
TRPM4
PADI4
GRM5
ERCC1
PCDH15
S100A6
ADH7
GLO1
POLR2F
CSNK1A1
HTR1A
GPX4
ACER1
ASAH2B
NR1H3
TRPC7
KIF5B
DROSHA
VIPR1
ACAT1
GALT
ABCD3
APTX
PHKB
PHKA1
GMPPA
APCS
CFD
GRB2
GRHPR
CLDN14
SLC2A3
MYOG
MYH3
KCNN4
NRCAM
GP9
PNLIP
PLD2
FLT4
EIF2AK2
F13A1
FPGS
KRAS
ADAR
MPI
DOLK
HSD11B2
LYN
KYNU
ATP6V1B1
UCP3
WT1
HSPB2
P2RY2
ADH6
ASH1L
NYNRIN
NTMT2
CGB7
SMOX
NNMT
CD63
CASP9
RGN
ARHGEF2
CBLIF
BLZF1
P3H3
WNT2B
SCGB1A1
CENPE
METAP2
GNAQ
S100P
STAT6
PRLR
CAST
AK1
AMPD3
APOA2
ATP5MF
EEF2
BAAT
CES1
MT1A
CAD
SCARB1
KIF1A
AGMAT
GCKR
POLR2H
GLS
KCNH1
IL4I1
EIF4E
TMSB4X
SLC4A4
HSD17B1
PRKCZ
ARVCF
IGFBP6
FPR2
ATP10A
DNM1L
DHODH
SLC9A2
HK2
FCGR1A
BUB1B
POLA1
PDIA2
CSNK1G3
APAF1
SLC7A11
PTGER1
RBP3
PRDX6
RAP1A
RALBP1
OPLAH
RNF31
PAEP
STX4
RDX
P2RX4
ATG14
DLK1
H2AX
NEDD8
LYZL4
SARDH
VKORC1
TXNRD2
RPS6
RAC2
NAGK
CDA
MTHFD1L
PTPRU
EIF5A
CDK7
HDC
PPP1R14C
PPL
NAP1L4
DLG4
KAT2A
NMB
KDM4E
PLA2G10
SLN
CHRM4
NAPA
BIRC2
BAG1
PDE12
TCIRG1
LBR
CCL26
DDX3X
ALOX12
HLA-C
COTL1
CAPN1
RELN
ADH5
TCOF1
GRK6
COL6A2
FABP5
FAAH
CBX1
NT5E
KCNK6
SLC25A18
PRKCG
CADPS
HBA2
PYGB
H2BC12L
HDAC2
NMT1
PSME2
CHMP4A
CENPA
HTR1B
GUCA2B
DGKB
EIF4EBP2
SLC7A6
FOSL1
CAPN2
AZIN2
HCRTR1
MEN1
PMAIP1
GDPD3
RAB31
IL18R1
CANX
PCSK1
GRIA2
DCLRE1C
ACTG1
EZR
PARG
MYL9
HTR2A
RAB11A
PEMT
NAPG
AP2M1
NRAS
PRKACG
TXNRD1
CAMK2B
ROCK1
FKBP1B
ETF1
GLP1R
MYH7
PLN
PYCARD
IL23A
EPHA4
EPHB1
CHD4
CDK19
ATP6V1C1
EPHA8
AFMID
CAMK1G
MYBBP1A
SBK1
ARRB1
TAOK3
SMARCA4
EIF4G1
SLC18A3
AADAC
SMS
JAK1
GYPA
MAPKAPK2
KRTCAP2
TNNT2
TK1
GRK1
ATP6V0A1
EEA1
GNAI2
CLDN3
OLR1
CD28
MST1R
SEPTIN4
GPBAR1
SLC1A1
SV2A
GTF2F2
KCNH5
NPM1
APLN
AVP
CDX2
CD38
CAPN3
HK3
HKDC1
IGHMBP2
ATP5PF
APEH
ENTPD8
TSC2
PDE4B
MATN1
ULK1
PAICS
AKAP13
HDAC3
SLC25A5
LIPF
RRM1
G3BP2
MERTK
EIF4A1
CTTN
EGLN2
P3H2
KIF11
PKN1
FGR
FOXP2
CAPZA2
SLC24A2
ELOA
RMI2
AHCYL2
ENPEP
CHI3L1
SAG
EPHB2
OPRL1
DEFA1
FABP4
UNG
WARS1
SLC30A4
CLDN2
TSPAN32
PDPK1
TSHB
AQP5
RAB27A
CDS2
SPTA1
CSN3
SLC2A5
FXYD1
SLC27A1
NOLC1
ICAM3
CFB
BAP1
ABCA4
VPS4A
DHRS9
PMP22
P2RY6
P4HTM
RAG2
FFAR2
DDR1
MARCKS
PSMC6
MLST8
PLA2G5
CPNE1
PTPN11
FCAR
ITGA10
SOS1
CCND2
CALCR
YBX1
ZFP36L2
DLAT
AASS
STAB1
CYP51A1
PTGER4
MYO6
HDAC6
SLC25A12
HDAC7
GDF2
CYB561
ABCC9
TRDMT1
KLK1
RAB6A
TDP1
P2RX3
CYSLTR1
RIPK1
HIPK2
PLIN2
IGLC1
SLC9A1
PNPLA4
BMX
CKMT2
EIF2S2
CD160
JAK3
CCL7
S100A1
CHERP
PNPLA6
AKR1B10
CHRM5
MAT2B
GRM2
GAS6
PTGES3
ANP32A
CADM1
SPTAN1
GP1BB
FARS2
PGD
PLOD3
TET2
PLOD2
E2F4
GLRX
CDSN
MCRS1
GFER
PIK3R2
ADGRV1
TNFRSF10B
XBP1
CHD2
KLF6
KIF2B
PTGIR
FOXO1
NLRC4
ABCG5
EPHB3
PRKCI
ALDH18A1
SCN2B
SCN1B
PDK4
PFAS
ATP6V1B2
MAPKAPK3
SLC36A2
VPS4B
HUNK
OCLN
ANXA3
PYCR2
TRAPPC10
CEACAM4
GRK3
GART
RIPK4
DDAH1
PRKDC
TNNI3
MYL3
CKMT1B
PARK7
HYOU1
MGST1
CCNT2
BAZ2B
LST1
GSK3A
FSCN1
CEACAM7
AK6
AQP8
ALDH1A3
MYO9B
FABP3
PCYT1B
GSTM4
PSG2
ALDH1A2
PPP1R12A
REG1A
MYH14
CALD1
CNGB1
GPR68
ITGA11
WTAP
PRAP1
GCGR
HMGN1
FUBP1
CRYAA
ACO1
ALAS1
S100A10
ANO1
SUMO1
AURKA
POLD1
TAF9
SEPHS1
CAMKMT
CSTA
SLC25A17
JUND
RPL22
RGS17
MYH10
SRSF2
DLX3
GTF2B
CAPZB
FLT3
RIGI
ROR2
MYO3A
P2RY13
SLCO2A1
CCL19
PARD6A
MAP3K14
CAMK2A
GNAI3
UBA1
MYH11
LIM2
STK16
CDK6
EPHA3
RRM2
CDK12
SLC6A5
SCN3B
SCN4B
DDX1
CCL22
DDX25
PIPOX
LCP1
QPRT
PRF1
TPM1
NOD2
TERF2
ETS2
CAPN10
RAP1B
TEC
CD2
SET
GTF3C1
PEPC
EIF2AK3
PFKFB3
PFKFB2
DDB1
SPTBN1
PKIA
CFAP20
PIN1
MYH2
CBX3
TCEAL1
SAT2
HCK
PIM1
PLK4
RPS6KB2
SDHD
DHX9
RIPK3
CDK20
NR0B2
ATP6V0D1
HSPH1
CHRD
SLC6A14
GAR1
ETV7
HSPA9
KCNQ2
GALR1
LGR6
FMO1
DGAT1
ERCC6
[truncated: 127 more rows]

## Sheet: Sheet2
Differential expression information for key genes
Gene	adj.P.Val	P.Value	t	B	logFC
MMP9	0.0208	0.00108	4.49033	-0.76744	0.309603
ICAM1	0.0395	0.00346	3.77117	-1.95106	0.549034
TGFB1	0.0278	0.00187	-4.14362	-1.33064	-0.290588
TNF	0.00385	3.83e-05	-6.84955	2.60729	-1.07138

## Sheet: Sheet3
Detailed information on drug-pathway-target networks
Terms	Type
TNF	Gene
IL6	Gene
ICAM1	Gene
IL1B	Gene
EDN1	Gene
NFKB1	Gene
CSF2	Gene
MMP9	Gene
VCAM1	Gene
CXCL1	Gene
TNFRSF1B	Gene
MAPK13	Gene
RELA	Gene
NFKBIA	Gene
SOCS3	Gene
LTA	Gene
CHUK	Gene
IKBKB	Gene
TNF	Gene
CXCL8	Gene
ICAM1	Gene
IL1B	Gene
CXCL12	Gene
NFKB1	Gene
TLR4	Gene
CD14	Gene
VCAM1	Gene
CD40	Gene
CXCL1	Gene
IRAK1	Gene
RELA	Gene
NFKBIA	Gene
LTA	Gene
CHUK	Gene
IKBKB	Gene
TNF	Gene
IL6	Gene
IL1B	Gene
NOS2	Gene
SOD1	Gene
CAT	Gene
BDNF	Gene
IL1A	Gene
RAC1	Gene
NFKB1	Gene
APC	Gene
CTNNB1	Gene
TNFRSF1B	Gene
MAPK13	Gene
RELA	Gene
GPX3	Gene
BECN1	Gene
TNF	Gene
CXCL8	Gene
IL6	Gene
IL1B	Gene
RAC1	Gene
NFKB1	Gene
TLR4	Gene
CD14	Gene
CD40	Gene
IRAK1	Gene
MAPK13	Gene
RELA	Gene
TLR9	Gene
NFKBIA	Gene
CHUK	Gene
IKBKB	Gene
TNF	Gene
CXCL8	Gene
IL6	Gene
IL1B	Gene
RHOA	Gene
NFKB1	Gene
TLR4	Gene
P2RX7	Gene
CXCL1	Gene
MAPK13	Gene
RELA	Gene
NLRP3	Gene
NFKBIA	Gene
TXNIP	Gene
CHUK	Gene
IKBKB	Gene
TNF	Gene
VEGFA	Gene
IL1B	Gene
TGFB1	Gene
BDNF	Gene
IL1A	Gene
RAC1	Gene
NFKB1	Gene
CD14	Gene
TGFBR2	Gene
IRAK1	Gene
MAPK13	Gene
RELA	Gene
FLT1	Gene
CHUK	Gene
IKBKB	Gene
TNF signaling pathway	Pathway
NF-kappa B signaling pathway	Pathway
Pathways of neurodegeneration - multiple diseases	Pathway
Toll-like receptor signaling pathway	Pathway
NOD-like receptor signaling pathway	Pathway
MAPK signaling pathway	Pathway
Magnesium Sulfate	Drug

## Sheet: Sheet4
Abbreviations, full names and functional classifications of key targets
Abbreviation	Full name	Functional category
MMP9	Matrix Metallopeptidase 9	Matrix metalloproteinases
ICAM1	Intercellular Adhesion Molecule 1	Cell adhesion molecules
NFKB1	Nuclear Factor Kappa B Subunit 1	Inflammation-associated transcription factors
TGFB1	Transforming Growth Factor Beta 1	Immunomodulatory growth factors
TNF	Tumor Necrosis Factor	Proinflammatory cytokines
VCAM1	Vascular Cell Adhesion Molecule 1	Vascular adhesion molecules
ALB	Albumin	Plasma transport proteins
IL6	Interleukin 6	Polypotent proinflammatory cytokines
IL1B	Interleukin 1 Beta	Intrinsic immune core proinflammatory factors
CXCL8	C-X-C Motif Chemokine Ligand 8	Neutrophil chemokines
